# Supplementary material for: Humidity-driven degradation of sputtered molybdenum oxide and molybdenum–titanium-oxide thin films
Source: Royal Society of Chemistry journal article supplement (doi:10.1039/d2tc04267c), 2023-01-01
Supplement: d2tc04267c1.pdf [file d2tc04267c1.pdf]

## Supplementary Information

### Humidity-driven degradation of sputtered molybdenum titanium oxide and molybdenum-titanium-oxide thin films

Selina Goetz<sup>a,b,\*</sup>, Stefan Edinger<sup>a</sup>, Christian Linke<sup>c</sup>, Enrico Franzke<sup>c</sup>, Jörg Winkler<sup>c</sup>, Markus Valtiner<sup>b</sup>,  
Theodoros Dimopoulos<sup>a,\*</sup>

<sup>a</sup>*AIT Austrian Institute of Technology, Center for Energy, Vienna, Austria*

<sup>b</sup>*TU Wien, Institute of Applied Physics, Vienna, Austria*

<sup>c</sup>*Plansee SE, Reutte, Austria*

\* corresponding authors: [selina.goetz@chello.at](mailto:selina.goetz@chello.at), [theodoros.dimopoulos@ait.ac.at](mailto:theodoros.dimopoulos@ait.ac.at)

**Figure S1**

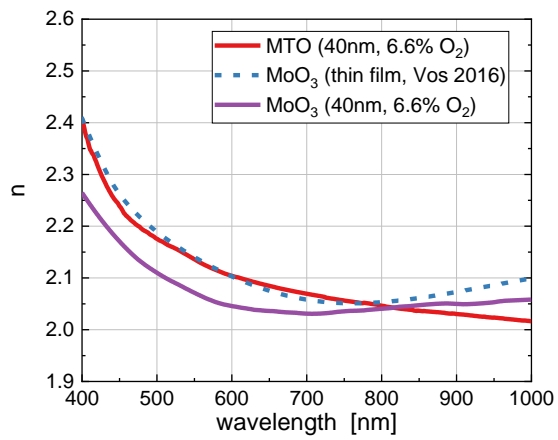

Refractive indices,  $n$ , of MTO and MoO<sub>3</sub>, extracted from transmittance and reflectance spectra (according to previous works [19, 21]) using a transfer-matrix-method based algorithm. The dashed line shows reported literature values of MoO<sub>3</sub> thin film (M. Vos, B. Macco, N. F. W. Thissen, A. A. Bol, W. M. M. Kessels. Atomic layer deposition of molybdenum oxide from (N<sup>t</sup>Bu)<sub>2</sub>(NMe<sub>2</sub>)<sub>2</sub>Mo and O<sub>2</sub> plasma, *J. Vac. Sci. Technol. A* 34, 01A103 (2016))

**Table S1**

| sample  | N       | O        | Na      | Mg      | Al       | Si      | S         | K       | Ca      | Mo      | Au      |
|---------|---------|----------|---------|---------|----------|---------|-----------|---------|---------|---------|---------|
| as-dep. | 4.6±1.6 | 65.3±7.8 | 2.3±0.4 | 1.5±0.2 | 1.1±0.18 | 5.8±0.5 | 0.5±0.3   | 0.5±0.2 | 0.9±0.2 | 9.8±0.8 | 8.3±1.0 |
| 30 days | 9.3±3.0 | 65.7±7.9 | 0.8±0.4 | 0.4±0.2 | 0.2±0.1  | 7.2±0.5 | 1.533±0.6 | 0.2±0.1 | 0.8±0.2 | 7.7±0.6 | 6.3±0.9 |

Elemental quantification of EDX measurements on 300 nm thick MoO<sub>3</sub> before and after 30 days in 81% relative humidity. The values are the average of measurements of several different spots on the sample, given in at.% and include the contributions from the underlying soda-lime glass substrate.

**Figure S2**

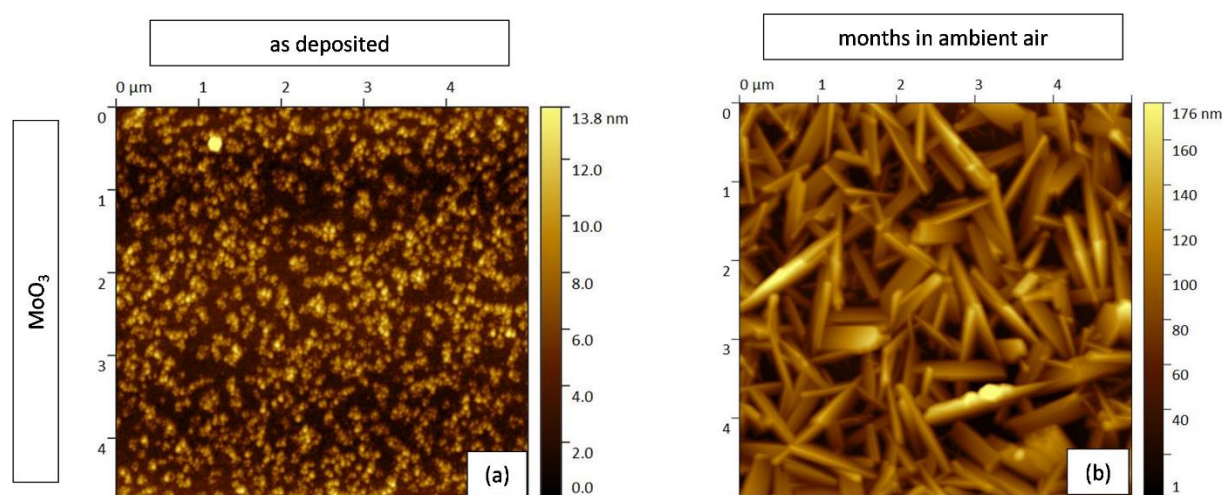

5×5 μm<sup>2</sup> AFM images of 50 nm thick MoO<sub>3</sub> films on glass, (a) as deposited and (b) after several months of storage in ambient air.

Figure S3

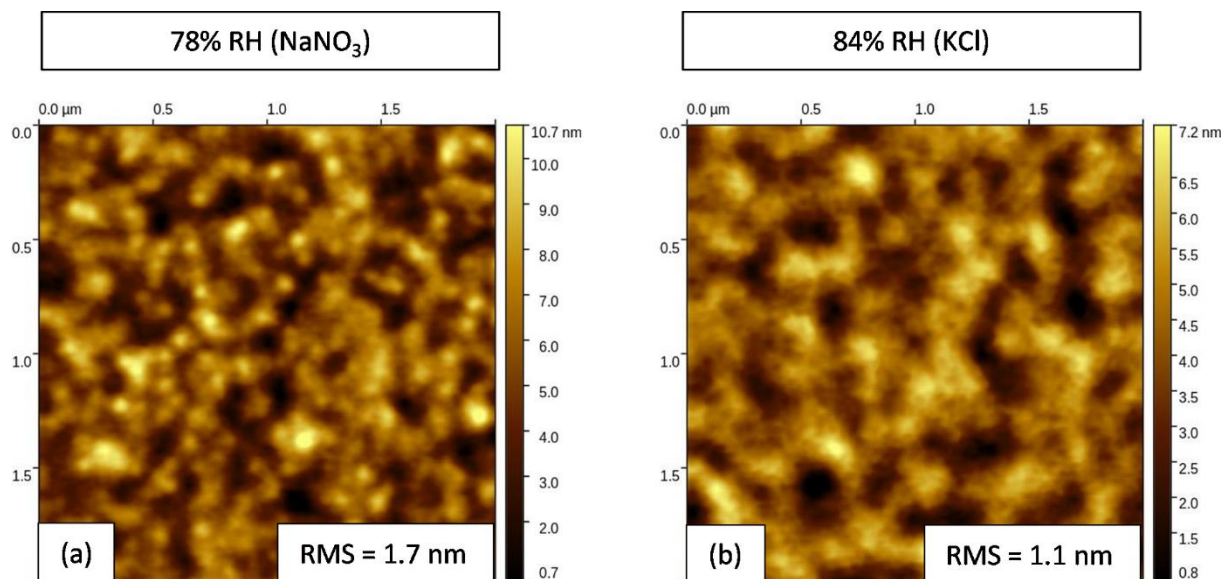

$2 \times 2 \mu\text{m}^2$  AFM images of  $\text{MoO}_3$  after 30 days in (a) 78% RH and (b) 84% RH.

Figure S4

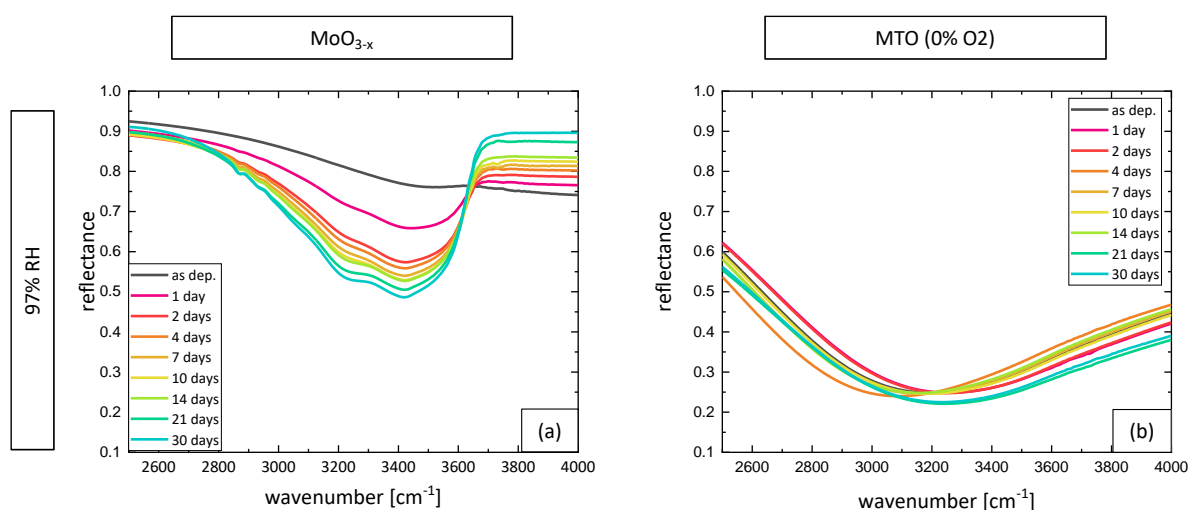

Time evolution of IR spectra of oxygen-deficient (i.e. sputtered without  $\text{O}_2$ ) (a)  $\text{MoO}_{3-x}$  exposed to 97% RH and (b) MTO (0%  $\text{O}_2$ ) exposed to 97% RH.
